# Supplementary material for: Direct analysis in real time (DART) and solid-phase microextraction (SPME) transmission mode (TM): a suitable platform for analysis of prohibited substances in small volumes
Source: Royal Society of Chemistry journal article supplement (doi:10.1039/c9ay00797k), 2019-01-01
Supplement: c9ay00797k1.pdf [file c9ay00797k1.pdf]

# **Direct Analysis in Real Time (DART) and Solid-Phase Microextraction (SPME) Transmission Mode (TM): A Suitable Platform for Analysis of Prohibited Substances in Small Volumes**

Tijana Vasiljevic<sup>a</sup> and Janusz Pawliszyn<sup>a\*</sup>

<sup>a</sup>Department of Chemistry, University of Waterloo, Waterloo, ON, Canada N2L 3G1

\*Corresponding author: Tel.: +1 519 888 4567 x 35123, Fax: +1 519 888 4348

Email: [janusz@uwaterloo.ca](mailto:janusz@uwaterloo.ca)

## **Electronic supplementary information**

**Summary:**

This document contains information pertaining to: (1) The mass-spectrometric conditions used on the TSQ-Vantage for the analysis of selected drugs; (2) Extraction time plots for selected analytes in oral fluid; (3) Measurement of nicotine in oral fluid obtained from 2 volunteers; (4) Extraction time plots for selected analytes in blood; (5) Skeletonization effect on the mesh's surface; and (6) SEM surface examination after blood extraction and DART desorption on SPME-TM meshes.

(1) Mass-spectrometric conditions used on the TSQ-Vantage for the analysis of selected drugs.

| Analyte            | Precursor m/z | Product m/z | S-lens | Collision energy (CE) |
|--------------------|---------------|-------------|--------|-----------------------|
| Cocaine            | 304.1         | 182.1       | 91     | 19                    |
| Cocaine-d3         | 307.1         | 185.1       | 116    | 18                    |
| Methamphetamine    | 150           | 91.1        | 63     | 20                    |
| Methamphetamine-d5 | 155.1         | 92.1        | 72     | 18                    |
| Methadone          | 310.2         | 265.1       | 93     | 14                    |
| Methadone-d3       | 313.1         | 268.1       | 93     | 13                    |
| Morphine           | 286.1         | 152.1       | 121    | 59                    |
| Morphine-d3        | 289.5         | 152.2       | 125    | 58                    |
| Heroin             | 370.1         | 165         | 165    | 29                    |
| Heroin-d9          | 379.2         | 272.1       | 171    | 46                    |
| Oxycodone          | 316.1         | 241.1       | 124    | 28                    |
| Oxycodone-d3       | 319.1         | 244.1       | 117    | 28                    |
| Codeine            | 300           | 152.1       | 120    | 60                    |
| Codeine-d3         | 303.1         | 152         | 125    | 68                    |
| LSD                | 324           | 223         | 118    | 23                    |
| LSD-d3             | 327           | 226         | 116    | 23                    |
| Benzoylcegonine    | 290.1         | 168.1       | 11     | 18                    |
| Benzoylcegonine-d3 | 293.1         | 171.1       | 98     | 18                    |
| Fentanyl           | 337.1         | 188         | 101    | 22                    |
| Fentanyl-d5        | 342           | 188         | 124    | 22                    |
| Nicotine           | 163.1         | 117         | 75     | 28                    |
| Nicotine-d4        | 167.1         | 121.1       | 71     | 28                    |
| Cocaethylene       | 318.1         | 195.7       | 78     | 20                    |

|                 |       |       |     |    |
|-----------------|-------|-------|-----|----|
| Cocaethylene-d3 | 321.1 | 198.7 | 120 | 20 |
| EDDP            | 278.1 | 233.9 | 78  | 31 |
| EDDP-d3         | 281.1 | 233.9 | 140 | 31 |

Table S1. Details relating to the analytes used, their internal standards, and their measured parent and product m/z values. TSQ-Vantage parameters (S-lens and CE value) are also included.

(2) Extraction time plots for selected analytes in oral fluid.

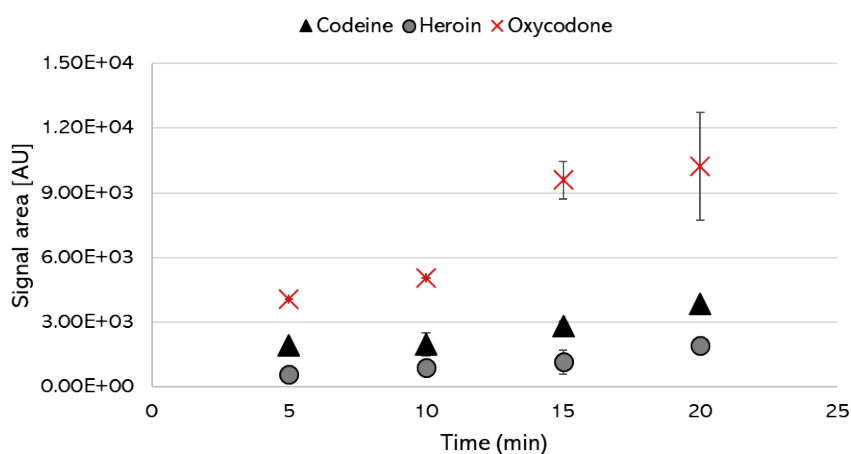

Figure S1. Extraction time plots for selected analytes spiked to 15  $\mu$ L of oral fluid and analysed via DART-MS/MS with as source temperature of 450  $^{\circ}$ C and rail speed of 0.2 mm sec $^{-1}$ .

| Extraction time (min) | S/N Ratios |        |           |
|-----------------------|------------|--------|-----------|
|                       | Codeine    | Heroin | Oxycodone |
| 5                     | 3.7        | 13.4   | 18.1      |
| 10                    | 3.8        | 19.7   | 22.4      |
| 15                    | 5.4        | 25.4   | 42.6      |
| 20                    | 7.3        | 41.8   | 45.5      |

Table S2. S/N ratios obtained for the time points examined in Figure S1.

(3) Measurement of nicotine in oral fluid obtained from of 2 volunteers

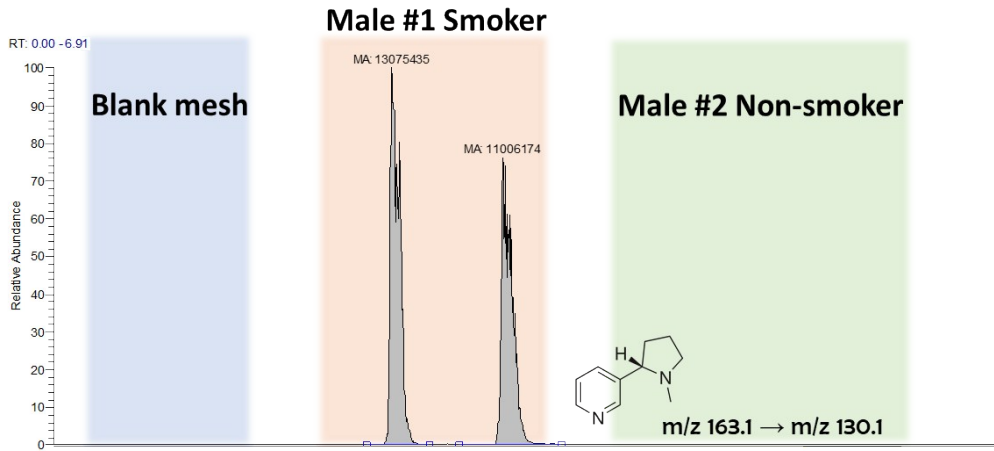

Figure S2. Ion chromatogram obtained for measurements of nicotine signal in blank mesh and oral fluid samples from a male smoker and a male non-smoker male (n=2, for all).

(4) Extraction time plots for selected analytes in blood.

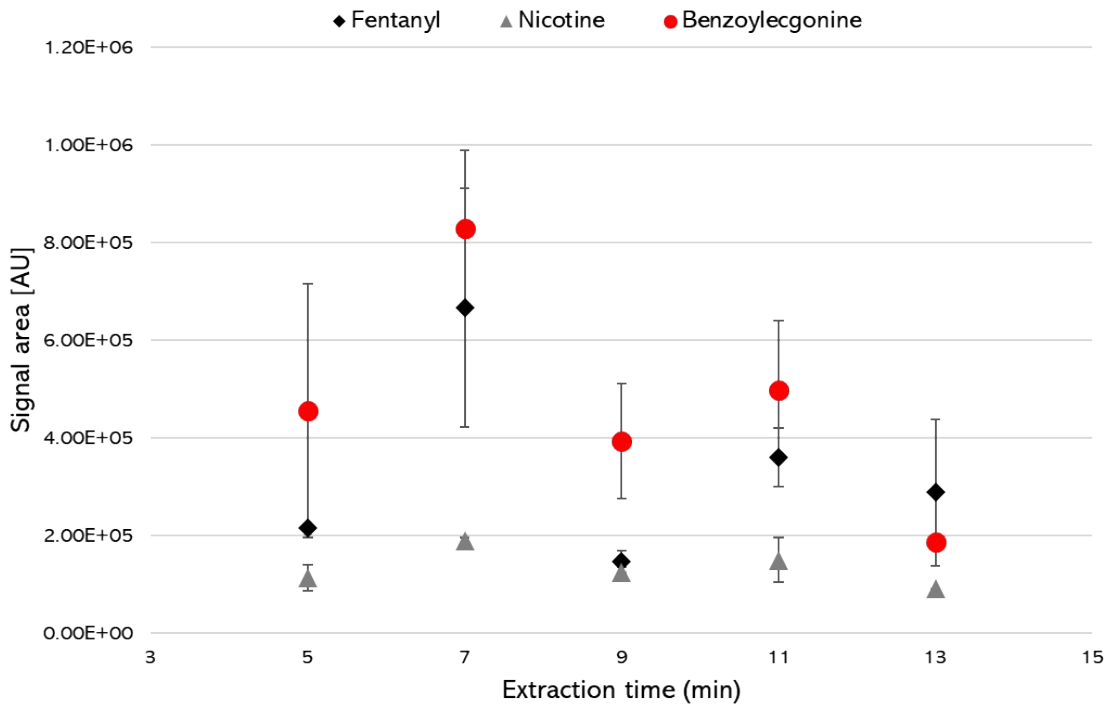

Figure S3. Extraction time plots for selected analytes (25 ng mL<sup>-1</sup>) spiked to 25  $\mu$ L of blood and analysed via DART-MS/MS with a source temperature of 450  $^{\circ}$ C and a rail speed of 0.2 mm sec<sup>-1</sup>.

| Extraction time (min) | S/N Ratios |          |                  |
|-----------------------|------------|----------|------------------|
|                       | Fentanyl   | Nicotine | Benzoyllecgonine |
| 5                     | 274.3      | 8.0      | 6.6              |
| 7                     | 851.5      | 13.2     | 11.9             |
| 9                     | 186.0      | 8.6      | 5.7              |
| 11                    | 460.8      | 10.4     | 7.2              |
| 13                    | 368.3      | 6.3      | 2.7              |

Table S3. S/N ratios obtained for time points examined in Figure S3.

(5) Skeletonization effect on mesh surface.

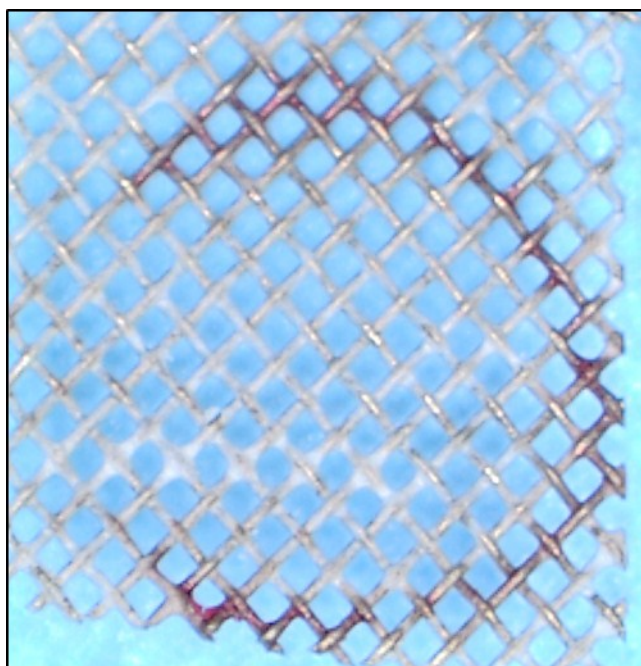

Figure S4. Formation of a “blood ring” or “skeletonization effect” on a dummy-mesh occurring in extractions exceeding 10 minutes.

(6) SEM surface examination after blood extraction on SPME-TM meshes.

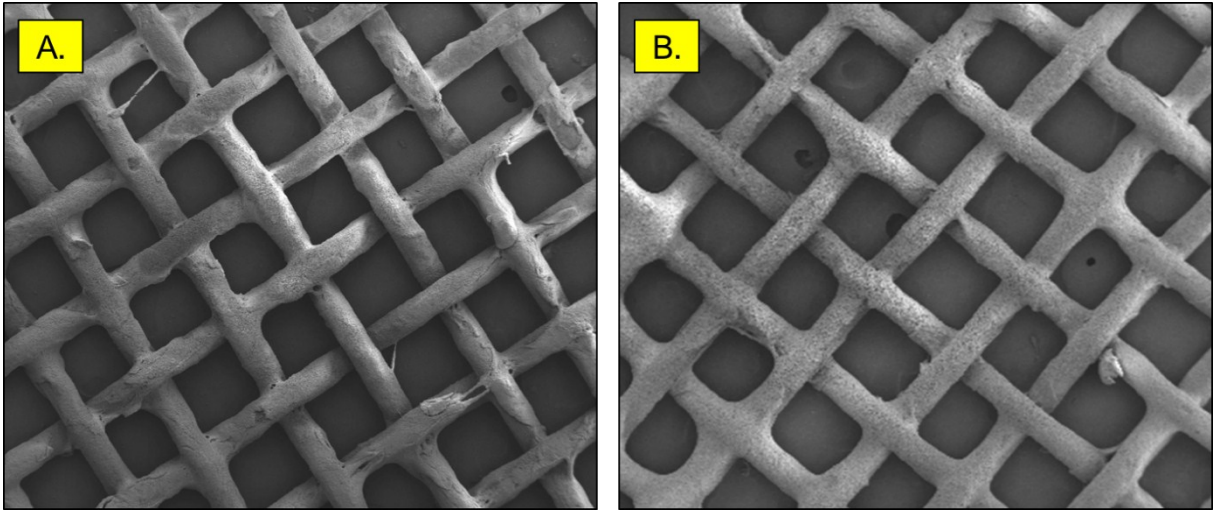

Figure S5. A. SEM image of a never-used HLB-coated mesh; B. image of a mesh used for a 7-minute blood extraction. Both images depict the mesh after the application of a wash step and DART desorption.
